# Supplementary material for: ADAM17 selectively activates the IL‐6 trans‐signaling/ERK MAPK axis in KRAS‐addicted lung cancer
Source: PubMed Central journal article supplement (PMC6460353; doi:10.15252/emmm.201809976), 2019-03-04
Supplement: EMMM-11-e9976-s001.pdf [file EMMM-11-e9976-s001.pdf]

## Appendix

### **ADAM17 selectively activates the IL-6 trans-signaling/ERK MAPK axis in KRAS-addicted lung cancer**

Mohamed I. Saad, Sultan Alhayyani, Louise McLeod, Liang Yu, Mohammad Alanazi, Virginie Deswaerte, Ke Tang, Thierry Jarde, Julian A. Smith, Zdenka Prodanovic, Michelle D. Tate, Jesse J. Balic, D. Neil Watkins, Jason E. Cain, Steven Bozinovski, Elizabeth Algar, Tomohiro Kohmoto, Hiromichi Ebi, Walter Ferlin, Christoph Garbers, Saleela Ruwanpura, Irit Sagi, Stefan Rose-John, Brendan J. Jenkins

#### Table of contents

**Appendix Figure S1. Genetic reduction of ADAM17 expression suppresses the 12-week-old LAC phenotype of *Kras*<sup>G12D</sup> mice.**

**Appendix Figure S2. Unaltered expression status of ADAM17 and its regulators in the lungs of *Kras*<sup>G12D</sup> mice.**

**Appendix Figure S3. Reduced proliferation, but not apoptosis or angiogenesis, is associated with suppressed tumorigenesis in an A17 pro-treated *KRAS* mutant LAC PDX.**

**Appendix Table S1. Clinicopathological features of patients used for immunohistochemical staining of pADAM17 and pERK1/2.**

**Appendix Table S2. Antibody dilutions used for immunoblotting, immunofluorescence and immunohistochemistry.**

**Appendix Table S3. Primer sequences used for qPCR.**

**Appendix Table S4. *P* values for differences between experimental groups in figures.**

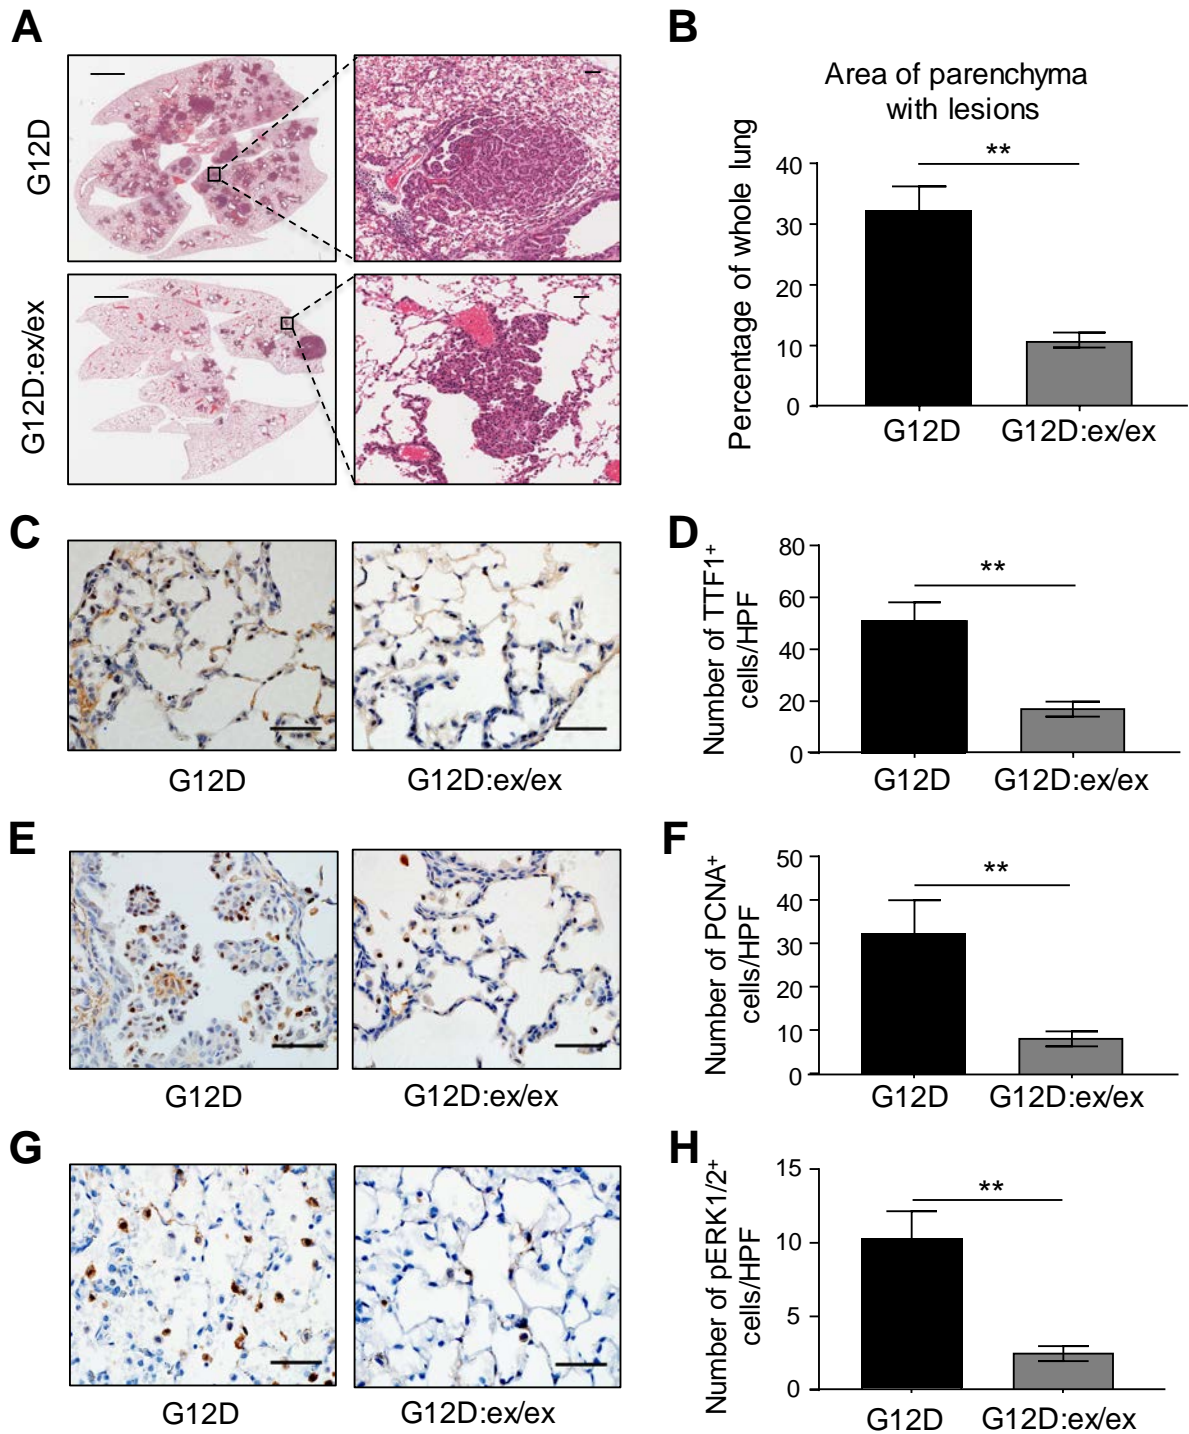

**Appendix Figure S1. Genetic reduction of ADAM17 expression suppresses the 12-week-old LAC phenotype of *Kras*<sup>G12D</sup> mice.**

**A** Representative low power (left) and high power (right) photomicrographs of H&E-stained lung cross-sections from *Kras*<sup>G12D</sup> and *Kras*<sup>G12D</sup>:*Adam17*<sup>ex/ex</sup> mice at 12 weeks following Ad-Cre inhalation. Scale bars, 3mm (left) and 300μm (right).

**B** Quantification of lung parenchyma area occupied by tumor lesions in the indicated genotypes from (A). Data are presented as the mean  $\pm$  SEM (n = 6). \*\* $P < 0.01$ , Student's *t*-test.

**C, E, G** Representative high power photomicrographs of lung cross-sections from *Kras*<sup>G12D</sup> and *Kras*<sup>G12D</sup>:*Adam17*<sup>ex/ex</sup> mice at 12 weeks following Ad-Cre inhalation that were stained with antibodies against TTF-1 (C), PCNA (E) and pERK1/2 MAPK (G). Scale bars, 100 $\mu$ m.

**D, F, H** Quantification of positive cells per high power field (HPF) stained for TTF-1 (D), PCNA (F) and pERK1/2 MAPK (H) in lungs of the indicated genotypes from (C), (E) and (G), respectively, at 12 weeks post Ad-Cre inhalation. Data are presented as the mean  $\pm$  SEM (n = 5). \*\* $P < 0.01$ , Student's *t*-test.

Exact *P* values are specified in Appendix Table S4.

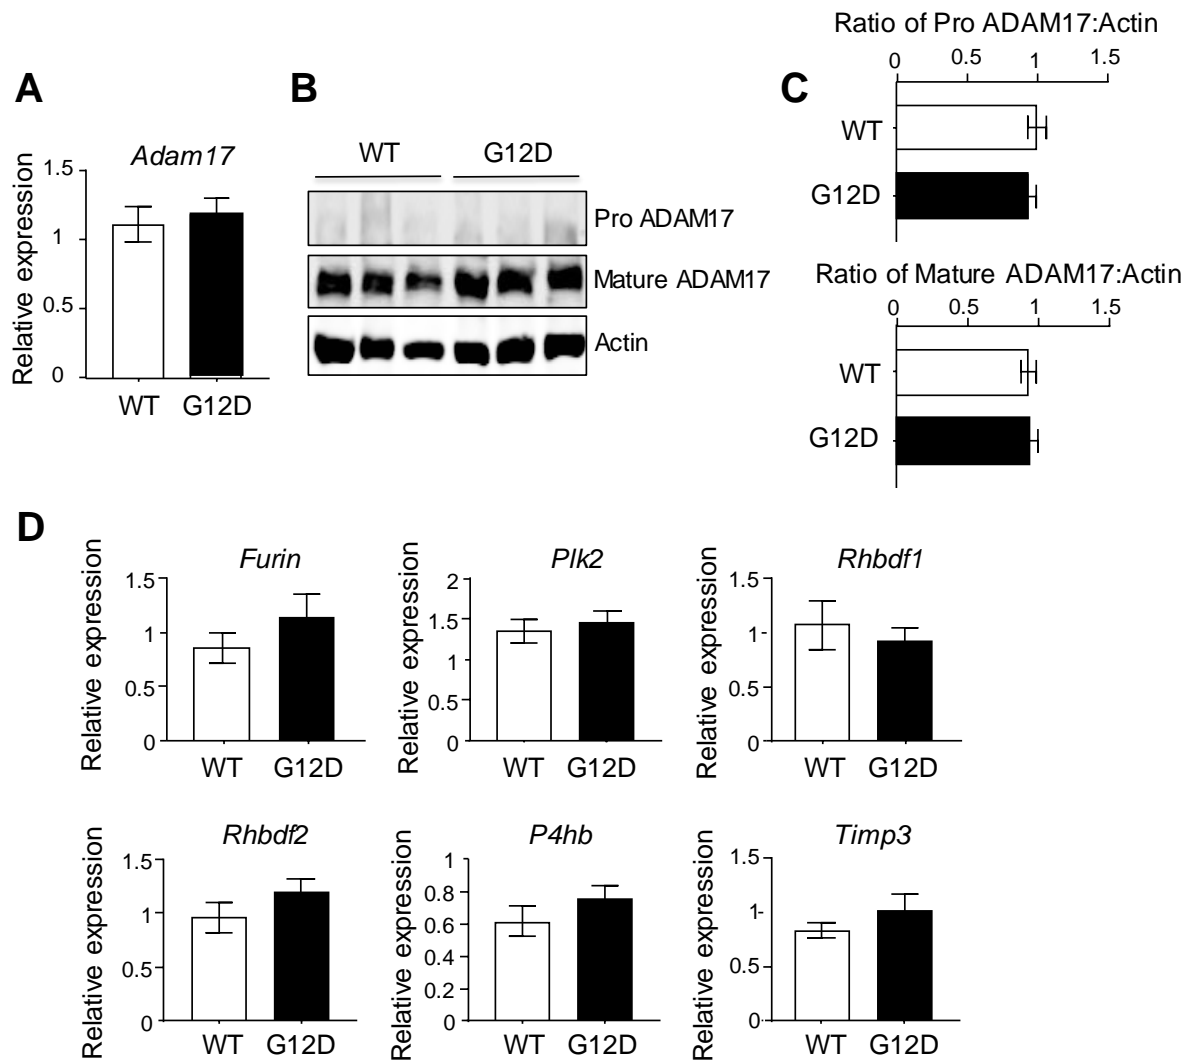

**Appendix Figure S2. Unaltered expression status of ADAM17 and its regulators in the lungs of *Kras*<sup>G12D</sup> mice.**

**A** qPCR gene expression analysis of *Adam17* on lung cDNA from *Kras*<sup>WT</sup> and *Kras*<sup>G12D</sup> mice at 6 weeks post inhalations. Expression data are normalized against *18S rRNA*. Data are presented as the mean ± SEM (n = 6 per genotype).

**B** Immunoblots of representative *Kras*<sup>WT</sup> and *Kras*<sup>G12D</sup> lung lysates with antibodies against ADAM17 (detecting pro and mature forms) and Actin. Note that for the Actin blot, lanes 4-6 are reproduced in lanes 1-3 of the Actin blot in Fig 4L.

**C** Densitometric semi-quantitative analysis of pro and mature ADAM17 protein levels in lung lysates from the mice indicated in (B). Relative expression was determined against Actin. Data are presented as the mean  $\pm$  SEM (n = 6 per genotype).

**D** qPCR expression analysis of the indicated genes in lungs of *Kras*<sup>WT</sup> and *Kras*<sup>G12D</sup> mice at 6 weeks post inhalations. Expression data are normalized against *18S rRNA*. Data are presented as the mean  $\pm$  SEM (n = 6 per genotype).

Exact *P* values are specified in Appendix Table S4.

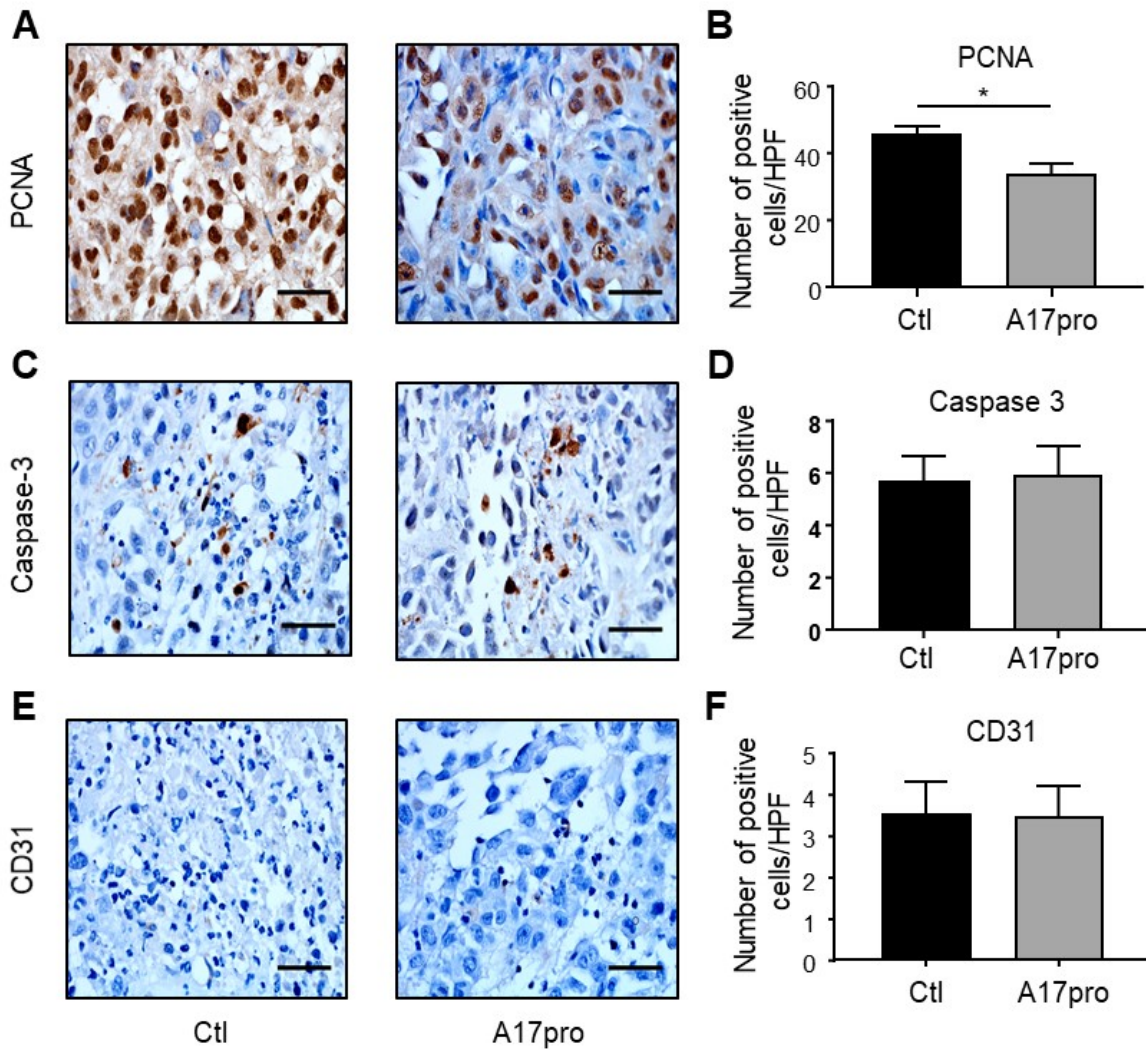

**Appendix Figure S3. Reduced proliferation, but not apoptosis or angiogenesis, is associated with suppressed tumorigenesis in an A17 pro-treated *KRAS* mutant LAC PDX.**

**A, C, E** Representative high power photomicrographs of lung cross-sections from a *KRAS* mutant PDX treated with vehicle control (Ctl) or A17pro (1mg/kg) every second day that were stained with antibodies against PCNA (A), cleaved Caspase-3 (C) and CD31 (E). Scale bars, 100µm.

**B, D, F** Quantification of positive cells per high power field (HPF) stained for PCNA (B), cleaved Caspase-3 (D) and CD31 (F) in the above treated *KRAS* mutant PDX. Data are presented as the mean  $\pm$  SEM (n = 5 per genotype). \* $P < 0.05$ , Student's *t*-test.

Exact *P* values are specified in Appendix Table S4.

**Appendix Table S1. Clinicopathological features of patients used for immunohistochemical staining of pADAM17 and pERK1/2.**

|                                             | LAC          | Non-LAC      |
|---------------------------------------------|--------------|--------------|
| <b>Mean age</b>                             |              |              |
| Years (range)                               | 69.8 (58-87) | 62.0 (47-71) |
| <b>Sex [number (%)]</b>                     |              |              |
| Male                                        | 10 (55.6)    | 6 (75)       |
| Female                                      | 8 (44.4)     | 2 (25)       |
| <b>Smoking history [number (%)]</b>         |              |              |
| Never                                       | 4 (22.2)     | 2 (25)       |
| Former                                      | 10 (55.6)    | 6 (75)       |
| Current                                     | 2 (11.1)     | 0 (0)        |
| Unknown                                     | 2 (11.1)     | 0 (0)        |
| <b>Tumor stage<sup>1</sup> [number (%)]</b> |              |              |
| I                                           | 12 (66.7)    | NA           |
| II                                          | 4 (22.2)     | NA           |
| Unknown                                     | 2 (11.1)     | NA           |
| <b>KRAS status [number (%)]</b>             |              |              |
| Wild-type                                   | 13 (72.2)    | NA           |
| Mutant                                      | 5 (27.8)     | NA           |

<sup>1</sup>American Joint Committee on Cancer staging for non-small cell lung cancer based on tumor (T)/node (N)/metastasis (M) classification; Stage I (IA/IB), Stage II (IIA/IIB), Stage III (IIIA/IIIB), Stage IV. NA, not applicable.

**Appendix Table S2. Antibody dilutions used for immunoblotting, immunofluorescence and immunohistochemistry.**

| <b>Immunohistochemistry</b>                        |                 |
|----------------------------------------------------|-----------------|
| <b>Antibody</b>                                    | <b>Dilution</b> |
| pThr <sup>735</sup> -ADAM17                        | 1:100           |
| pThr <sup>202</sup> /pTyr <sup>204</sup> -ERK1/2   | 1:100           |
| pThr <sup>180</sup> /pTyr <sup>182</sup> -p38 MAPK | 1:100           |
| B220                                               | 1:100           |
| CD3                                                | 1:100           |
| CD45                                               | 1:100           |
| Ly6G                                               | 1:100           |
| CD31                                               | 1:100           |
| TTF-1                                              | 1:100           |
| PCNA                                               | 1:5000          |
| Cleaved Caspase-3                                  | 1:100           |
| F4/80                                              | 1:150           |
| Cleaved Notch1                                     | 1:100           |
| <b>Immunofluorescence</b>                          |                 |
| <b>Antibody</b>                                    | <b>Dilution</b> |
| ADAM17                                             | 1:100           |
| CD31                                               | 1:100           |
| pThr <sup>735</sup> -ADAM17                        | 1:100           |
| CD45                                               | 1:100           |
| CC10                                               | 1:100           |
| SP-C                                               | 1:100           |
| IL-6R                                              | 1:100           |
| TGF $\alpha$                                       | 1:100           |



|                                  |       |
|----------------------------------|-------|
| Nrg1                             | 1:100 |
| EGF                              | 1:100 |
| Podoplanin                       | 1:100 |
| Alexa Fluor secondary antibodies | 1:200 |

---

**Immunoblotting**

---

| <b>Antibody</b>                                    | <b>Dilution</b> |
|----------------------------------------------------|-----------------|
| ADAM17                                             | 1:500           |
| pThr <sup>735</sup> -ADAM17                        | 1:500           |
| Myc                                                | 1:1000          |
| pTyr <sup>705</sup> -STAT3                         | 1:1000          |
| pSer <sup>727</sup> -STAT3                         | 1:1000          |
| STAT3                                              | 1:1000          |
| pSer <sup>473</sup> -AKT                           | 1:1000          |
| AKT                                                | 1:1000          |
| pThr <sup>202</sup> /pTyr <sup>204</sup> -ERK1/2   | 1:1000          |
| ERK1/2                                             | 1:1000          |
| pThr <sup>180</sup> /pTyr <sup>182</sup> -p38 MAPK | 1:1000          |
| p38 MAPK                                           | 1:1000          |
| pTyr <sup>1068</sup> -EGFR                         | 1:1000          |
| EGFR                                               | 1:1000          |
| pSer <sup>82</sup> -HSP27                          | 1:1000          |
| Cleaved Notch1                                     | 1:500           |
| IL-6R                                              | 1:500           |
| Nrg1                                               | 1:1000          |
| pTyr <sup>1289</sup> -ErbB3                        | 1:1000          |
| ErbB3                                              | 1:1000          |
| TGF $\alpha$                                       | 1:500           |

Actin

1:500

---

**Appendix Table S3. Primer sequences used for qPCR.**

| <b>Gene</b>   | <b>Forward</b>              | <b>Reverse</b>         |
|---------------|-----------------------------|------------------------|
| <i>Ccnd1</i>  | AGTGCGTGCAGAAGGAGATT        | AGGAAGCGGTCCAGGTAGTT   |
| <i>Ccnb1</i>  | TAGGGTGTCTTCTCGAATCGGGG     | ACGCTTGGCGCCTGCCATA    |
| <i>Cdc42</i>  | GAAAATGTGAAAGAAAAGTGG       | TCTGGAGTAATAGGCTTCTGT  |
| <i>Myc</i>    | CGGACACACAACGTCTTGGA        | AGGATGTAGGCGGTGGCTTTT  |
| <i>Il1b</i>   | CAACCAACAAGTGATATTCTCCATG   | GATCCACACTCTCCAGCTGCA  |
| <i>Il7a</i>   | ACCGCAATGAAGACCCTGAT        | TCCCTCCGCATTGACACA     |
| <i>Il6</i>    | ATGGATGCTACCAAAGTGGAT       | TGAAGGACTCTGGCTTTGTCT  |
| <i>Cxcl2</i>  | AACATCCAGAGCTTGAGTGTGA      | TTCAGGGTCAAGGCAAAGT    |
| <i>Vegf</i>   | GCACACAGGACGGCTTGAAGA       | CCCACGACAGAAGAGCAGA    |
| <i>Mmp2</i>   | GCTCTATGGGCCCTCCCCCG        | CGTGGTGTCACTGTCCGCCA   |
| <i>Il6r</i>   | AAGCAGCAGGCAATGTTACC        | CATAAATAGTCCCCAGTGTCTG |
| <i>Hes1</i>   | ACCTTCCAGTGGCTCCTC          | TTTAGTGTCCGTCAGAAGAGAG |
| <i>Hey1</i>   | GCCGAAGTTGCCCGTTATCTG       | TGTGTGGGTGATGTCCGAAGG  |
| <i>Furin</i>  | GGCTCTAAGAAAGGGGGTTG        | TGCAAAAGGCACATCAGAAG   |
| <i>Plk2</i>   | CGGTGCTGAAATACTTTTCTCAT     | TCGGGAGATCACCACCAT     |
| <i>Rhbdf1</i> | AGCTATGTCAAGCGGCAGAT        | TTCCGAAGTACCGAGTCCAC   |
| <i>Rhbdf2</i> | TGCCTGACGATGTCTTTGAG        | TAGCTTCGGTTGAGCCAGTT   |
| <i>P4hb</i>   | TGACCTGGCTCAGCAGTATG        | AAACCGATGACCGTCACTTC   |
| <i>Timp3</i>  | TCCTAGACCCAGTTCCATATACACTTC | TTGGACTTCTGCCAACTTCCTT |

**Appendix Table S4. *P* values for differences between experimental groups in figures.**

| <b>Figure 1B</b>               |                            |                     |                |                       |
|--------------------------------|----------------------------|---------------------|----------------|-----------------------|
| <b>Student's <i>t</i>-test</b> |                            | <b>Significant?</b> | <b>Summary</b> | <b><i>P</i> value</b> |
| G12D                           | G12D:ex/+                  | Yes                 | *              | 0.0347                |
| G12D                           | G12D:ex/ex                 | Yes                 | ***            | 0.0001                |
| G12D:ex/+                      | G12D:ex/ex                 | Yes                 | ***            | 0.0001                |
| <b>Figure 1C</b>               |                            |                     |                |                       |
| <b>Student's <i>t</i>-test</b> |                            | <b>Significant?</b> | <b>Summary</b> | <b><i>P</i> value</b> |
| G12D                           | G12D:ex/+                  | No                  | ns             | 0.1236                |
| G12D                           | G12D:ex/ex                 | Yes                 | ***            | 0.0001                |
| G12D:ex/+                      | G12D:ex/ex                 | Yes                 | *              | 0.0260                |
| <b>Figure 1E</b>               |                            |                     |                |                       |
| <b>Student's <i>t</i>-test</b> |                            | <b>Significant?</b> | <b>Summary</b> | <b><i>P</i> value</b> |
| WT                             | G12D                       | Yes                 | **             | 0.0022                |
| WT                             | G12D:ex/+                  | Yes                 | **             | 0.0022                |
| WT                             | G12D:ex/ex                 | No                  | ns             | 0.3939                |
| G12D                           | G12D:ex/+                  | Yes                 | **             | 0.0043                |
| G12D                           | G12D:ex/ex                 | Yes                 | **             | 0.0022                |
| G12D:ex/+                      | G12D:ex/ex                 | Yes                 | *              | 0.0152                |
| <b>Figure 2B</b>               |                            |                     |                |                       |
| <b>Student's <i>t</i>-test</b> |                            | <b>Significant?</b> | <b>Summary</b> | <b><i>P</i> value</b> |
| WT                             | G12D                       | Yes                 | **             | 0.0022                |
| WT                             | G12D:ex/ex                 | No                  | ns             | 0.2403                |
| G12D                           | G12D:ex/ex                 | Yes                 | **             | 0.0022                |
| <b>Figure 2C</b>               |                            |                     |                |                       |
| <b>Student's <i>t</i>-test</b> |                            | <b>Significant?</b> | <b>Summary</b> | <b><i>P</i> value</b> |
| <i>Ccnd1</i>                   |                            |                     |                |                       |
| WT                             | G12D                       | Yes                 | *              | 0.0181                |
| WT                             | G12D:ex/ex                 | No                  | ns             | 0.3374                |
| G12D                           | G12D:ex/ex                 | Yes                 | *              | 0.0428                |
| <i>Ccnb1</i>                   |                            |                     |                |                       |
| WT                             | G12D                       | Yes                 | *              | 0.0110                |
| WT                             | G12D:ex/ex                 | No                  | ns             | 0.0635                |
| G12D                           | G12D:ex/ex                 | Yes                 | **             | 0.0034                |
| <i>Cdc42</i>                   |                            |                     |                |                       |
| WT                             | G12D                       | Yes                 | *              | 0.0124                |
| WT                             | G12D:ex/ex                 | No                  | ns             | 0.4533                |
| G12D                           | G12D:ex/ex                 | Yes                 | *              | 0.0462                |
| <i>Myc</i>                     |                            |                     |                |                       |
| WT                             | G12D                       | Yes                 | *              | 0.0181                |
| WT                             | G12D:ex/ex                 | No                  | ns             | 0.4026                |
| G12D                           | G12D:ex/ex                 | Yes                 | *              | 0.0290                |
| <b>Figure 2E</b>               |                            |                     |                |                       |
| <b>Student's <i>t</i>-test</b> |                            | <b>Significant?</b> | <b>Summary</b> | <b><i>P</i> value</b> |
| G12D                           | G12D:ex/ex                 | Yes                 | **             | 0.0079                |
| <b>Figure 2G</b>               |                            |                     |                |                       |
| <b>Student's <i>t</i>-test</b> |                            | <b>Significant?</b> | <b>Summary</b> | <b><i>P</i> value</b> |
| WT                             | G12D                       | Yes                 | **             | 0.0022                |
| WT                             | G12D:ex/ex                 | Yes                 | **             | 0.0022                |
| G12D                           | G12D:ex/ex                 | Yes                 | **             | 0.0022                |
| <b>Figure 3H</b>               |                            |                     |                |                       |
| <b>Student's <i>t</i>-test</b> |                            | <b>Significant?</b> | <b>Summary</b> | <b><i>P</i> value</b> |
| Kras <sup>Kras</sup>           | Kras <sup>Kras:ex/ex</sup> | No                  | ns             | 0.8502                |

| <b>Figure 4B</b>               |            |                     |                |                       |
|--------------------------------|------------|---------------------|----------------|-----------------------|
| <b>Student's <i>t</i>-test</b> |            | <b>Significant?</b> | <b>Summary</b> | <b><i>P</i> value</b> |
| WT                             | G12D       | Yes                 | **             | 0.0079                |
| <b>Figure 4D</b>               |            |                     |                |                       |
| <b>Student's <i>t</i>-test</b> |            | <b>Significant?</b> | <b>Summary</b> | <b><i>P</i> value</b> |
| WT                             | G12D       | Yes                 | *              | 0.0317                |
| <b>Figure 4F</b>               |            |                     |                |                       |
| <b>Student's <i>t</i>-test</b> |            | <b>Significant?</b> | <b>Summary</b> | <b><i>P</i> value</b> |
| WT                             | G12D       | Yes                 | **             | 0.0079                |
| WT                             | G12D       | No                  | ns             | 0.8413                |
| <b>Figure 4H</b>               |            |                     |                |                       |
| <b>Student's <i>t</i>-test</b> |            | <b>Significant?</b> | <b>Summary</b> | <b><i>P</i> value</b> |
| Ctl                            | SB         | Yes                 | **             | 0.0079                |
| Ctl                            | U0         | No                  | ns             | >0.9999               |
| SB                             | U0         | Yes                 | *              | 0.0317                |
| <b>Figure 4J</b>               |            |                     |                |                       |
| <b>Student's <i>t</i>-test</b> |            | <b>Significant?</b> | <b>Summary</b> | <b><i>P</i> value</b> |
| Ctl                            | SB         | Yes                 | **             | 0.0079                |
| Ctl                            | SB         | Yes                 | *              | 0.0317                |
| <b>Figure 4K</b>               |            |                     |                |                       |
| <b>Student's <i>t</i>-test</b> |            | <b>Significant?</b> | <b>Summary</b> | <b><i>P</i> value</b> |
| Ctl                            | SB         | Yes                 | **             | 0.0012                |
| Ctl                            | SB         | Yes                 | **             | 0.0095                |
| <b>Figure 4N</b>               |            |                     |                |                       |
| <b>Student's <i>t</i>-test</b> |            | <b>Significant?</b> | <b>Summary</b> | <b><i>P</i> value</b> |
| G12D                           | G12D:ex/ex | Yes                 | **             | 0.0079                |
| <b>Figure 5A</b>               |            |                     |                |                       |
| <b>Student's <i>t</i>-test</b> |            | <b>Significant?</b> | <b>Summary</b> | <b><i>P</i> value</b> |
| <b>sIL-6R</b>                  |            |                     |                |                       |
| WT                             | G12D       | Yes                 | *              | 0.0334                |
| WT                             | G12D:ex/ex | No                  | ns             | 0.3577                |
| G12D                           | G12D:ex/ex | Yes                 | **             | 0.0016                |
| <b>TNF<math>\alpha</math></b>  |            |                     |                |                       |
| WT                             | G12D       | No                  | ns             | 0.8481                |
| WT                             | G12D:ex/ex | No                  | ns             | 0.4436                |
| G12D                           | G12D:ex/ex | No                  | ns             | 0.4931                |
| <b>Figure 5E</b>               |            |                     |                |                       |
| <b>Student's <i>t</i>-test</b> |            | <b>Significant?</b> | <b>Summary</b> | <b><i>P</i> value</b> |
| Ctl                            | 1F7        | Yes                 | *              | 0.0357                |
| Ctl                            | 25F10      | No                  | ns             | 0.1429                |
| 1F7                            | 25F10      | No                  | ns             | 0.1000                |
| <b>Figure 6B</b>               |            |                     |                |                       |
| <b>Student's <i>t</i>-test</b> |            | <b>Significant?</b> | <b>Summary</b> | <b><i>P</i> value</b> |
| Norm                           | LAC        | Yes                 | *              | 0.0228                |
| <b>Figure 6C</b>               |            |                     |                |                       |
| <b>Student's <i>t</i>-test</b> |            | <b>Significant?</b> | <b>Summary</b> | <b><i>P</i> value</b> |
| WT                             | MUT        | Yes                 | *              | 0.0228                |
| WT                             | MUT        | Yes                 | **             | 0.0056                |
| <b>Figure 6H</b>               |            |                     |                |                       |
| <b>Student's <i>t</i>-test</b> |            | <b>Significant?</b> | <b>Summary</b> | <b><i>P</i> value</b> |
| HBEC                           | A549       | Yes                 | **             | 0.0012                |
| HBEC                           | H23        | Yes                 | **             | 0.0043                |
| HBEC                           | H2228      | Yes                 | **             | 0.0012                |
| A549                           | H23        | No                  | ns             | 0.1490                |

|                                         |        |                     |                |                       |
|-----------------------------------------|--------|---------------------|----------------|-----------------------|
| A549                                    | H2228  | Yes                 | **             | 0.0012                |
| H23                                     | H2228  | Yes                 | **             | 0.0025                |
| <b>Figure 6I</b>                        |        |                     |                |                       |
| <b>Student's <i>t</i>-test</b>          |        | <b>Significant?</b> | <b>Summary</b> | <b><i>P</i> value</b> |
| Ctl                                     | KO     | Yes                 | **             | 0.0043                |
| <b>Figure 6J</b>                        |        |                     |                |                       |
| <b>Student's <i>t</i>-test</b>          |        | <b>Significant?</b> | <b>Summary</b> | <b><i>P</i> value</b> |
| Ctl                                     | KO     | Yes                 | *              | 0.0286                |
| <b>Figure 6K</b>                        |        |                     |                |                       |
| <b>Student's <i>t</i>-test</b>          |        | <b>Significant?</b> | <b>Summary</b> | <b><i>P</i> value</b> |
| Ctl                                     | KO     | Yes                 | ***            | 0.0006                |
| <b>Figure 6L</b>                        |        |                     |                |                       |
| <b>Multiple Student's <i>t</i>-test</b> |        | <b>Significant?</b> | <b>Summary</b> | <b><i>P</i> value</b> |
| (0) Ctl                                 | KO     | No                  | ns             | 0.2838                |
| (3) Ctl                                 | KO     | No                  | ns             | 0.3088                |
| (6) Ctl                                 | KO     | Yes                 | *              | 0.0475                |
| (9) Ctl                                 | KO     | Yes                 | *              | 0.0246                |
| (12) Ctl                                | KO     | Yes                 | *              | 0.0320                |
| (15) Ctl                                | KO     | Yes                 | *              | 0.0445                |
| (18) Ctl                                | KO     | Yes                 | *              | 0.0180                |
| (21) Ctl                                | KO     | Yes                 | *              | 0.0256                |
| <b>Figure 6M</b>                        |        |                     |                |                       |
| <b>Student's <i>t</i>-test</b>          |        | <b>Significant?</b> | <b>Summary</b> | <b><i>P</i> value</b> |
| Ctl                                     | KO     | Yes                 | **             | 0.0079                |
| <b>Figure 7B</b>                        |        |                     |                |                       |
| <b>Student's <i>t</i>-test</b>          |        | <b>Significant?</b> | <b>Summary</b> | <b><i>P</i> value</b> |
| Ctl                                     | A17pro | Yes                 | **             | 0.0057                |
| <b>Figure 7D</b>                        |        |                     |                |                       |
| <b>Student's <i>t</i>-test</b>          |        | <b>Significant?</b> | <b>Summary</b> | <b><i>P</i> value</b> |
| Ctl                                     | A17pro | Yes                 | **             | 0.0072                |
| <b>Figure 7F</b>                        |        |                     |                |                       |
| <b>Student's <i>t</i>-test</b>          |        | <b>Significant?</b> | <b>Summary</b> | <b><i>P</i> value</b> |
| Ctl                                     | A17pro | Yes                 | **             | 0.0022                |
| <b>Figure 7H</b>                        |        |                     |                |                       |
| <b>Student's <i>t</i>-test</b>          |        | <b>Significant?</b> | <b>Summary</b> | <b><i>P</i> value</b> |
| Ctl                                     | A17pro | Yes                 | *              | 0.0481                |
| <b>Figure 7I</b>                        |        |                     |                |                       |
| <b>Student's <i>t</i>-test</b>          |        | <b>Significant?</b> | <b>Summary</b> | <b><i>P</i> value</b> |
| Ctl                                     | A17pro | Yes                 | *              | 0.0411                |
| <b>Figure 7J</b>                        |        |                     |                |                       |
| <b>Multiple Student's <i>t</i>-test</b> |        | <b>Significant?</b> | <b>Summary</b> | <b><i>P</i> value</b> |
| (0) Ctl                                 | A17pro | No                  | ns             | 0.6895                |
| (2) Ctl                                 | A17pro | No                  | ns             | 0.2255                |
| (4) Ctl                                 | A17pro | No                  | ns             | 0.4237                |
| (6) Ctl                                 | A17pro | Yes                 | *              | 0.0065                |
| (8) Ctl                                 | A17pro | Yes                 | *              | 0.0017                |
| (10) Ctl                                | A17pro | Yes                 | *              | 0.0069                |
| (12) Ctl                                | A17pro | Yes                 | *              | 0.0065                |
| (14) Ctl                                | A17pro | Yes                 | *              | 0.0062                |
| <b>Figure 7K</b>                        |        |                     |                |                       |
| <b>Student's <i>t</i>-test</b>          |        | <b>Significant?</b> | <b>Summary</b> | <b><i>P</i> value</b> |
| Ctl                                     | A17pro | Yes                 | *              | 0.0411                |
| <b>Figure 7M</b>                        |        |                     |                |                       |
| <b>Student's <i>t</i>-test</b>          |        | <b>Significant?</b> | <b>Summary</b> | <b><i>P</i> value</b> |

|                                |            |                     |                |                       |
|--------------------------------|------------|---------------------|----------------|-----------------------|
| Ctl                            | A17pro     | Yes                 | *              | 0.0240                |
| <b>Figure EV1A</b>             |            |                     |                |                       |
| <b>Student's <i>t</i>-test</b> |            | <b>Significant?</b> | <b>Summary</b> | <b><i>P</i> value</b> |
| G12D                           | G12D:ex/ex | Yes                 | **             | 0.0022                |
| <b>Figure EV1C</b>             |            |                     |                |                       |
| <b>Student's <i>t</i>-test</b> |            | <b>Significant?</b> | <b>Summary</b> | <b><i>P</i> value</b> |
| G12D                           | G12D:ex/ex | Yes                 | *              | 0.0152                |
| <b>Figure EV1D</b>             |            |                     |                |                       |
| <b>Student's <i>t</i>-test</b> |            | <b>Significant?</b> | <b>Summary</b> | <b><i>P</i> value</b> |
| G12D                           | G12D:ex/ex | Yes                 | **             | 0.0043                |
| <b>Figure EV1E</b>             |            |                     |                |                       |
| <b>Student's <i>t</i>-test</b> |            | <b>Significant?</b> | <b>Summary</b> | <b><i>P</i> value</b> |
| G12D                           | G12D:ex/ex | Yes                 | *              | 0.0433                |
| <b>Figure EV1F</b>             |            |                     |                |                       |
| <b>Student's <i>t</i>-test</b> |            | <b>Significant?</b> | <b>Summary</b> | <b><i>P</i> value</b> |
| G12D                           | G12D:ex/ex | Yes                 | *              | 0.0455                |
| <b>Figure EV2B</b>             |            |                     |                |                       |
| <b>Student's <i>t</i>-test</b> |            | <b>Significant?</b> | <b>Summary</b> | <b><i>P</i> value</b> |
| WT                             | G12D       | Yes                 | **             | 0.0022                |
| WT                             | G12D:ex/ex | Yes                 | **             | 0.0043                |
| G12D                           | G12D:ex/ex | Yes                 | *              | 0.0411                |
| <b>Figure EV2D</b>             |            |                     |                |                       |
| <b>Student's <i>t</i>-test</b> |            | <b>Significant?</b> | <b>Summary</b> | <b><i>P</i> value</b> |
| WT                             | G12D       | Yes                 | **             | 0.0022                |
| WT                             | G12D:ex/ex | Yes                 | *              | 0.0411                |
| G12D                           | G12D:ex/ex | No                  | ns             | 0.0931                |
| <b>Figure EV2F</b>             |            |                     |                |                       |
| <b>Student's <i>t</i>-test</b> |            | <b>Significant?</b> | <b>Summary</b> | <b><i>P</i> value</b> |
| WT                             | G12D       | Yes                 | *              | 0.0260                |
| WT                             | G12D:ex/ex | No                  | ns             | 0.5887                |
| G12D                           | G12D:ex/ex | Yes                 | *              | 0.0152                |
| <b>Figure EV2H</b>             |            |                     |                |                       |
| <b>Student's <i>t</i>-test</b> |            | <b>Significant?</b> | <b>Summary</b> | <b><i>P</i> value</b> |
| WT                             | G12D       | No                  | ns             | 0.1667                |
| WT                             | G12D:ex/ex | No                  | ns             | 0.9069                |
| G12D                           | G12D:ex/ex | No                  | ns             | 0.2900                |
| <b>Figure EV2I</b>             |            |                     |                |                       |
| <i>Il1b</i>                    |            |                     |                |                       |
| <b>Student's <i>t</i>-test</b> |            | <b>Significant?</b> | <b>Summary</b> | <b><i>P</i> value</b> |
| G12D                           | G12D:ex/ex | Yes                 | **             | 0.0032                |
| <i>Il17a</i>                   |            |                     |                |                       |
| <b>Student's <i>t</i>-test</b> |            | <b>Significant?</b> | <b>Summary</b> | <b><i>P</i> value</b> |
| G12D                           | G12D:ex/ex | Yes                 | *              | 0.0353                |
| <i>Il6</i>                     |            |                     |                |                       |
| <b>Student's <i>t</i>-test</b> |            | <b>Significant?</b> | <b>Summary</b> | <b><i>P</i> value</b> |
| G12D                           | G12D:ex/ex | Yes                 | *              | 0.0489                |
| <b>Figure EV2K</b>             |            |                     |                |                       |
| <b>Student's <i>t</i>-test</b> |            | <b>Significant?</b> | <b>Summary</b> | <b><i>P</i> value</b> |
| G12D                           | G12D:ex/ex | No                  | ns             | 0.3651                |
| <b>Figure EV2M</b>             |            |                     |                |                       |
| <b>Student's <i>t</i>-test</b> |            | <b>Significant?</b> | <b>Summary</b> | <b><i>P</i> value</b> |
| G12D                           | G12D:ex/ex | No                  | ns             | 0.1688                |
| <b>Figure EV2N</b>             |            |                     |                |                       |
| <i>Cxcl2</i>                   |            |                     |                |                       |

| Student's <i>t</i> -test |            | Significant? | Summary | <i>P</i> value |
|--------------------------|------------|--------------|---------|----------------|
| G12D                     | G12D:ex/ex | No           | ns      | 0.1775         |
| <b><i>Vegf</i></b>       |            |              |         |                |
| Student's <i>t</i> -test |            | Significant? | Summary | <i>P</i> value |
| G12D                     | G12D:ex/ex | No           | ns      | 0.5887         |
| <b><i>Mmp2</i></b>       |            |              |         |                |
| Student's <i>t</i> -test |            | Significant? | Summary | <i>P</i> value |
| G12D                     | G12D:ex/ex | No           | ns      | 0.6623         |
| <b>Figure EV3C</b>       |            |              |         |                |
| Student's <i>t</i> -test |            | Significant? | Summary | <i>P</i> value |
| G12D                     | G12D:ex/ex | No           | ns      | 0.0649         |
| <b>Figure EV3D</b>       |            |              |         |                |
| <b><i>Hes1</i></b>       |            |              |         |                |
| Student's <i>t</i> -test |            | Significant? | Summary | <i>P</i> value |
| G12D                     | G12D:ex/ex | No           | ns      | 0.1797         |
| <b><i>Hey1</i></b>       |            |              |         |                |
| Student's <i>t</i> -test |            | Significant? | Summary | <i>P</i> value |
| G12D                     | G12D:ex/ex | No           | ns      | 0.3095         |
| <b>Figure EV5A</b>       |            |              |         |                |
| Student's <i>t</i> -test |            | Significant? | Summary | <i>P</i> value |
| Ctl                      | KO         | Yes          | **      | 0.0012         |
| <b>Figure EV5B</b>       |            |              |         |                |
| Student's <i>t</i> -test |            | Significant? | Summary | <i>P</i> value |
| Ctl                      | KO         | Yes          | **      | 0.0043         |
| <b>Figure EV5C</b>       |            |              |         |                |
| Student's <i>t</i> -test |            | Significant? | Summary | <i>P</i> value |
| Ctl                      | KO         | Yes          | **      | 0.0022         |
| <b>Figure EV5D</b>       |            |              |         |                |
| Student's <i>t</i> -test |            | Significant? | Summary | <i>P</i> value |
| Ctl                      | A17pro     | Yes          | **      | 0.0022         |
| Ctl                      | A17pro     | Yes          | ***     | 0.0003         |
| <b>Figure EV5E</b>       |            |              |         |                |
| Student's <i>t</i> -test |            | Significant? | Summary | <i>P</i> value |
| Ctl                      | A17pro     | Yes          | *       | 0.0254         |
| Ctl                      | A17pro     | Yes          | ***     | 0.0007         |
| <b>Figure EV5F</b>       |            |              |         |                |
| Student's <i>t</i> -test |            | Significant? | Summary | <i>P</i> value |
| Ctl                      | A17pro     | Yes          | *       | 0.0424         |
| Ctl                      | A17pro     | Yes          | **      | 0.0022         |
| <b>Figure EV5H</b>       |            |              |         |                |
| Student's <i>t</i> -test |            | Significant? | Summary | <i>P</i> value |
| Ctl                      | KO         | Yes          | *       | 0.0286         |
| Ctl                      | GW         | Yes          | *       | 0.0286         |
| Ctl                      | A17pro     | Yes          | *       | 0.0286         |
| KO                       | GW         | No           | ns      | 0.2739         |
| KO                       | A17pro     | No           | ns      | 0.7490         |
| GW                       | A17pro     | No           | ns      | 0.1402         |
| <b>Figure EV5I</b>       |            |              |         |                |
| Student's <i>t</i> -test |            | Significant? | Summary | <i>P</i> value |
| Ctl                      | GW         | Yes          | *       | 0.0496         |
| Ctl                      | GW         | Yes          | *       | 0.0295         |
| <b>Figure EV5J</b>       |            |              |         |                |
| Student's <i>t</i> -test |            | Significant? | Summary | <i>P</i> value |
| Ctl                      | GW         | Yes          | *       | 0.0466         |



|                                |            |                     |                |                       |
|--------------------------------|------------|---------------------|----------------|-----------------------|
| Ctl                            | GW         | Yes                 | *              | 0.0357                |
| <b>Figure EV5K</b>             |            |                     |                |                       |
| <b>Student's <i>t</i>-test</b> |            | <b>Significant?</b> | <b>Summary</b> | <b><i>P</i> value</b> |
| Ctl                            | GW         | Yes                 | **             | 0.0079                |
| Ctl                            | GW         | Yes                 | **             | 0.0079                |
| <b>Figure S1B</b>              |            |                     |                |                       |
| <b>Student's <i>t</i>-test</b> |            | <b>Significant?</b> | <b>Summary</b> | <b><i>P</i> value</b> |
| G12D                           | G12D:ex/ex | Yes                 | **             | 0.0022                |
| <b>Figure S1D</b>              |            |                     |                |                       |
| <b>Student's <i>t</i>-test</b> |            | <b>Significant?</b> | <b>Summary</b> | <b><i>P</i> value</b> |
| G12D                           | G12D:ex/ex | Yes                 | **             | 0.0022                |
| <b>Figure S1F</b>              |            |                     |                |                       |
| <b>Student's <i>t</i>-test</b> |            | <b>Significant?</b> | <b>Summary</b> | <b><i>P</i> value</b> |
| G12D                           | G12D:ex/ex | Yes                 | **             | 0.0079                |
| <b>Figure S1H</b>              |            |                     |                |                       |
| <b>Student's <i>t</i>-test</b> |            | <b>Significant?</b> | <b>Summary</b> | <b><i>P</i> value</b> |
| G12D                           | G12D:ex/ex | Yes                 | **             | 0.0079                |
| <b>Figure S2A</b>              |            |                     |                |                       |
| <b>Student's <i>t</i>-test</b> |            | <b>Significant?</b> | <b>Summary</b> | <b><i>P</i> value</b> |
| WT                             | G12D       | No                  | ns             | 0.7221                |
| <b>Figure S2C</b>              |            |                     |                |                       |
| <b>Student's <i>t</i>-test</b> |            | <b>Significant?</b> | <b>Summary</b> | <b><i>P</i> value</b> |
| WT                             | G12D       | No                  | ns             | 0.2046                |
| WT                             | G12D       | No                  | ns             | 0.9372                |
| <b>Figure S2D</b>              |            |                     |                |                       |
| <b><i>Furin</i></b>            |            |                     |                |                       |
| <b>Student's <i>t</i>-test</b> |            | <b>Significant?</b> | <b>Summary</b> | <b><i>P</i> value</b> |
| WT                             | G12D       | No                  | ns             | 0.5476                |
| <b><i>Plk2</i></b>             |            |                     |                |                       |
| <b>Student's <i>t</i>-test</b> |            | <b>Significant?</b> | <b>Summary</b> | <b><i>P</i> value</b> |
| WT                             | G12D       | No                  | ns             | 0.8413                |
| <b><i>Rhbd1</i></b>            |            |                     |                |                       |
| <b>Student's <i>t</i>-test</b> |            | <b>Significant?</b> | <b>Summary</b> | <b><i>P</i> value</b> |
| WT                             | G12D       | No                  | ns             | >0.9999               |
| <b><i>Rhbd2</i></b>            |            |                     |                |                       |
| <b>Student's <i>t</i>-test</b> |            | <b>Significant?</b> | <b>Summary</b> | <b><i>P</i> value</b> |
| WT                             | G12D       | No                  | ns             | 0.4206                |
| <b><i>P4hb</i></b>             |            |                     |                |                       |
| <b>Student's <i>t</i>-test</b> |            | <b>Significant?</b> | <b>Summary</b> | <b><i>P</i> value</b> |
| WT                             | G12D       | No                  | ns             | 0.2783                |
| <b><i>Timp3</i></b>            |            |                     |                |                       |
| <b>Student's <i>t</i>-test</b> |            | <b>Significant?</b> | <b>Summary</b> | <b><i>P</i> value</b> |
| WT                             | G12D       | No                  | ns             | 0.3326                |
| <b>Figure S3B</b>              |            |                     |                |                       |
| <b>Student's <i>t</i>-test</b> |            | <b>Significant?</b> | <b>Summary</b> | <b><i>P</i> value</b> |
| Ctl                            | A17pro     | Yes                 | *              | 0.0133                |
| <b>Figure S3D</b>              |            |                     |                |                       |
| <b>Student's <i>t</i>-test</b> |            | <b>Significant?</b> | <b>Summary</b> | <b><i>P</i> value</b> |
| Ctl                            | A17pro     | No                  | ns             | 0.8468                |
| <b>Figure S3F</b>              |            |                     |                |                       |
| <b>Student's <i>t</i>-test</b> |            | <b>Significant?</b> | <b>Summary</b> | <b><i>P</i> value</b> |
| Ctl                            | A17pro     | No                  | ns             | 0.9496                |
