# Supplementary material for: ADAM17 selectively activates the IL‐6 trans‐signaling/ERK MAPK axis in KRAS‐addicted lung cancer
Source: PubMed Central journal article supplement (PMC6460353; doi:10.15252/emmm.201809976), 2019-03-04
Supplement: EMMM-11-e9976-s004.pdf [file EMMM-11-e9976-s004.pdf]

Figure 4C

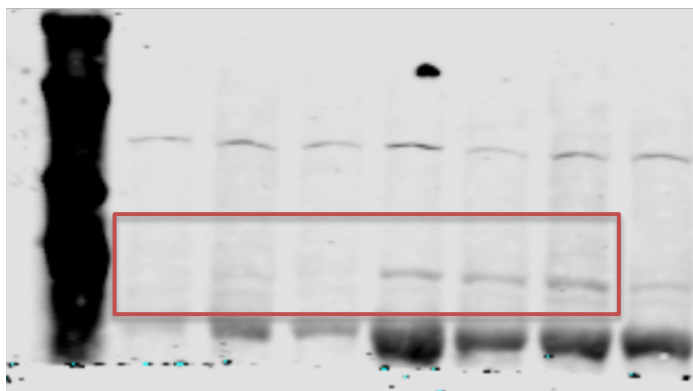

pADAM17

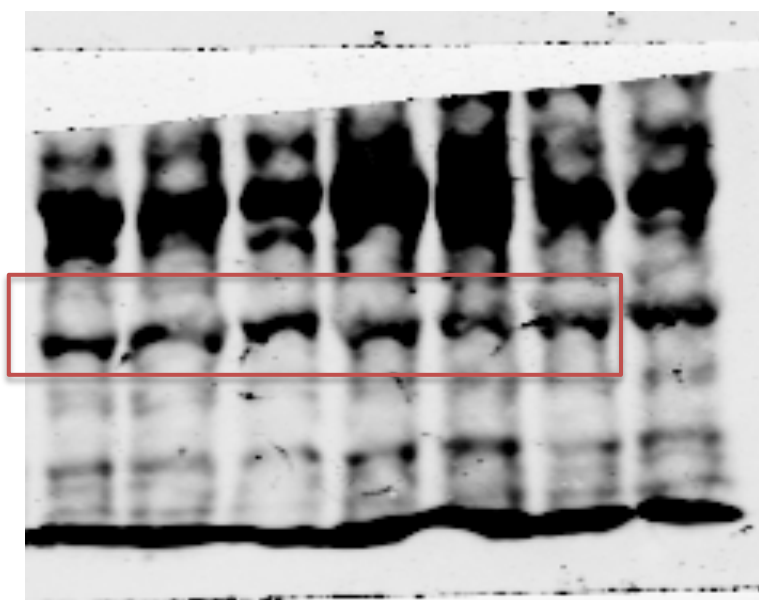

Actin

**Figure 4E**

pp38 MAPK

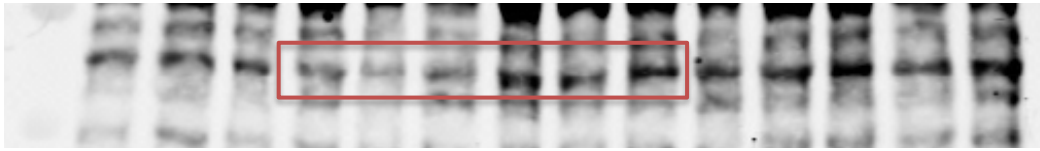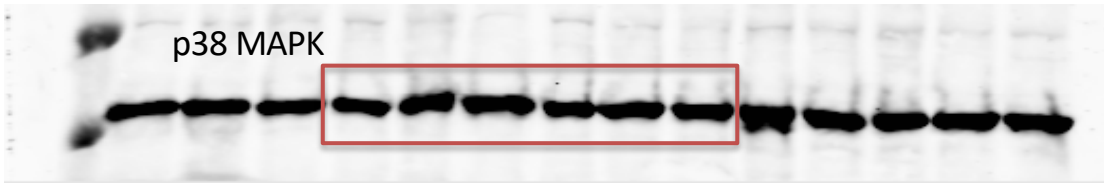

The lanes 4-9 from the left in the above blots are reproduced and used in Fig 4L.

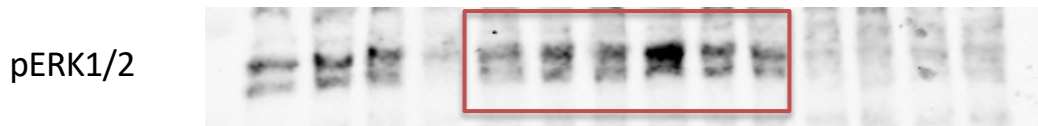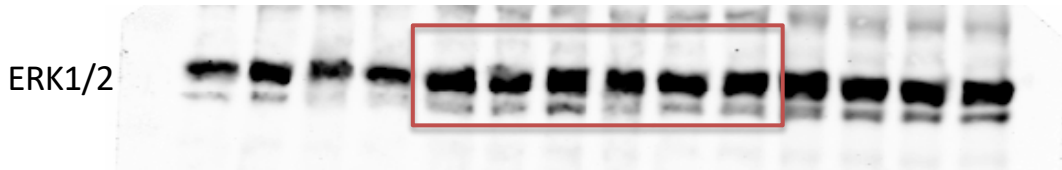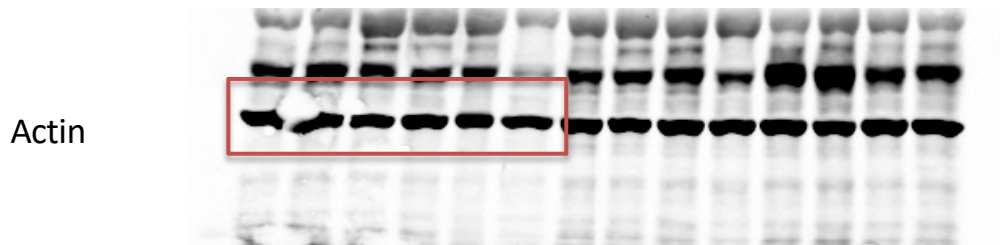

**Figure 4I**

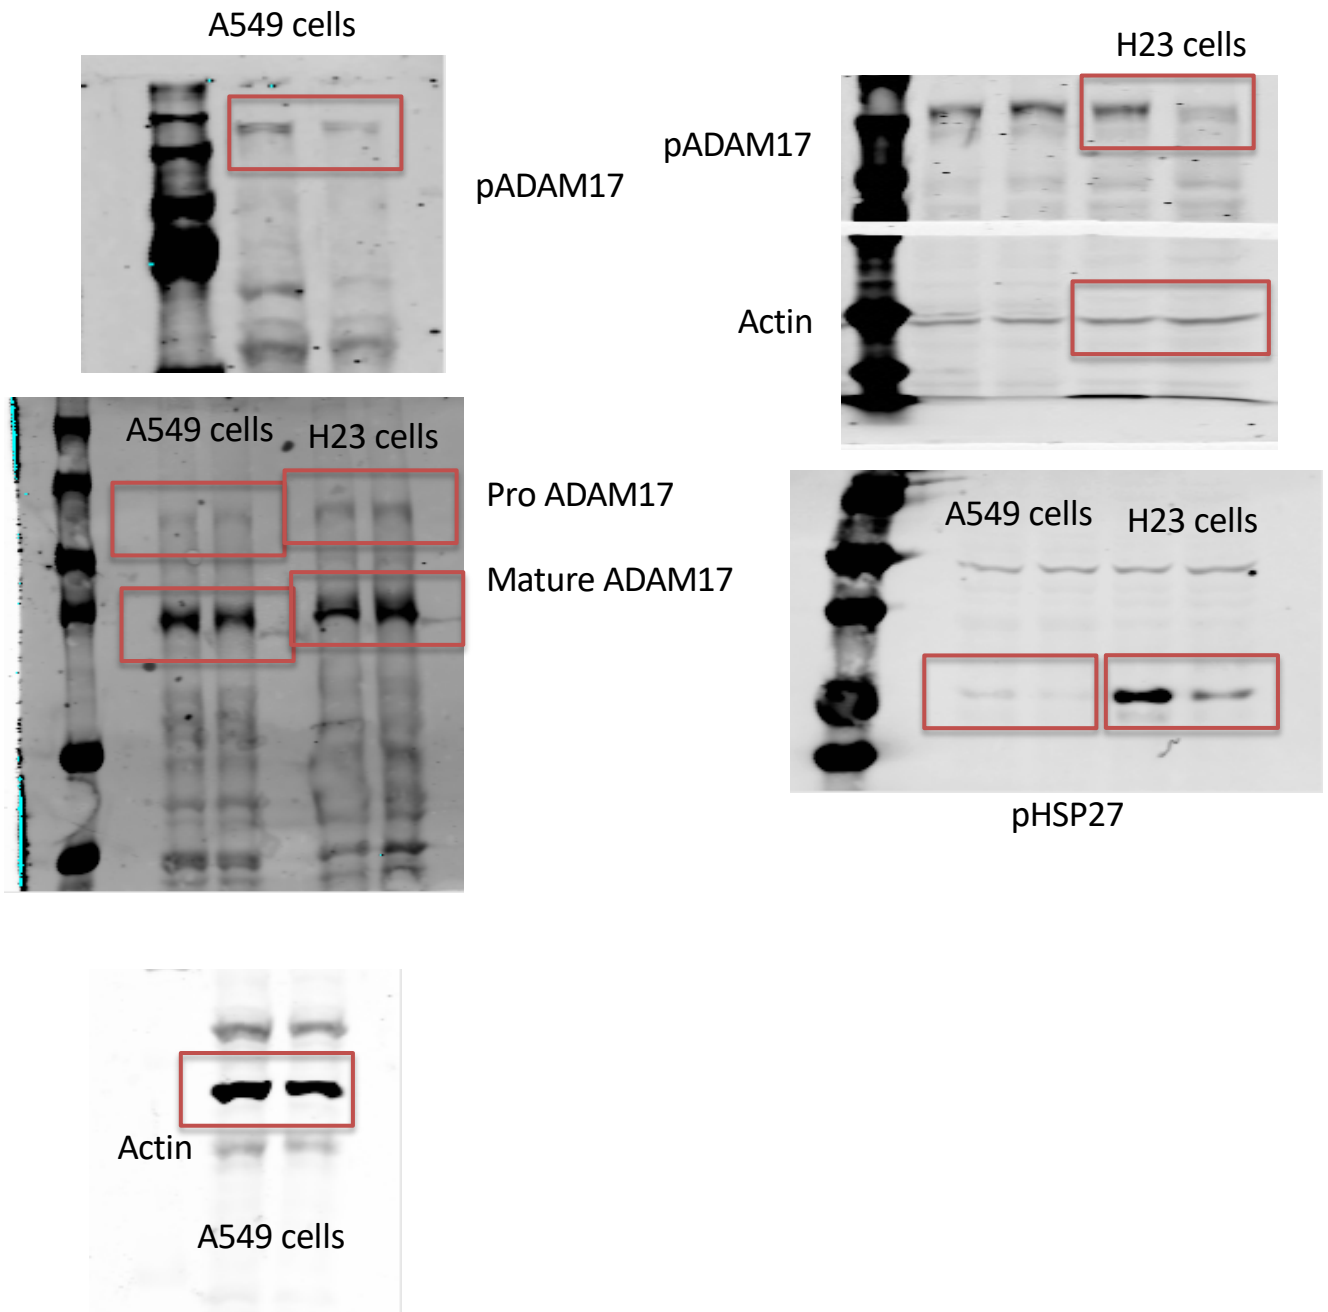

Figure 4L

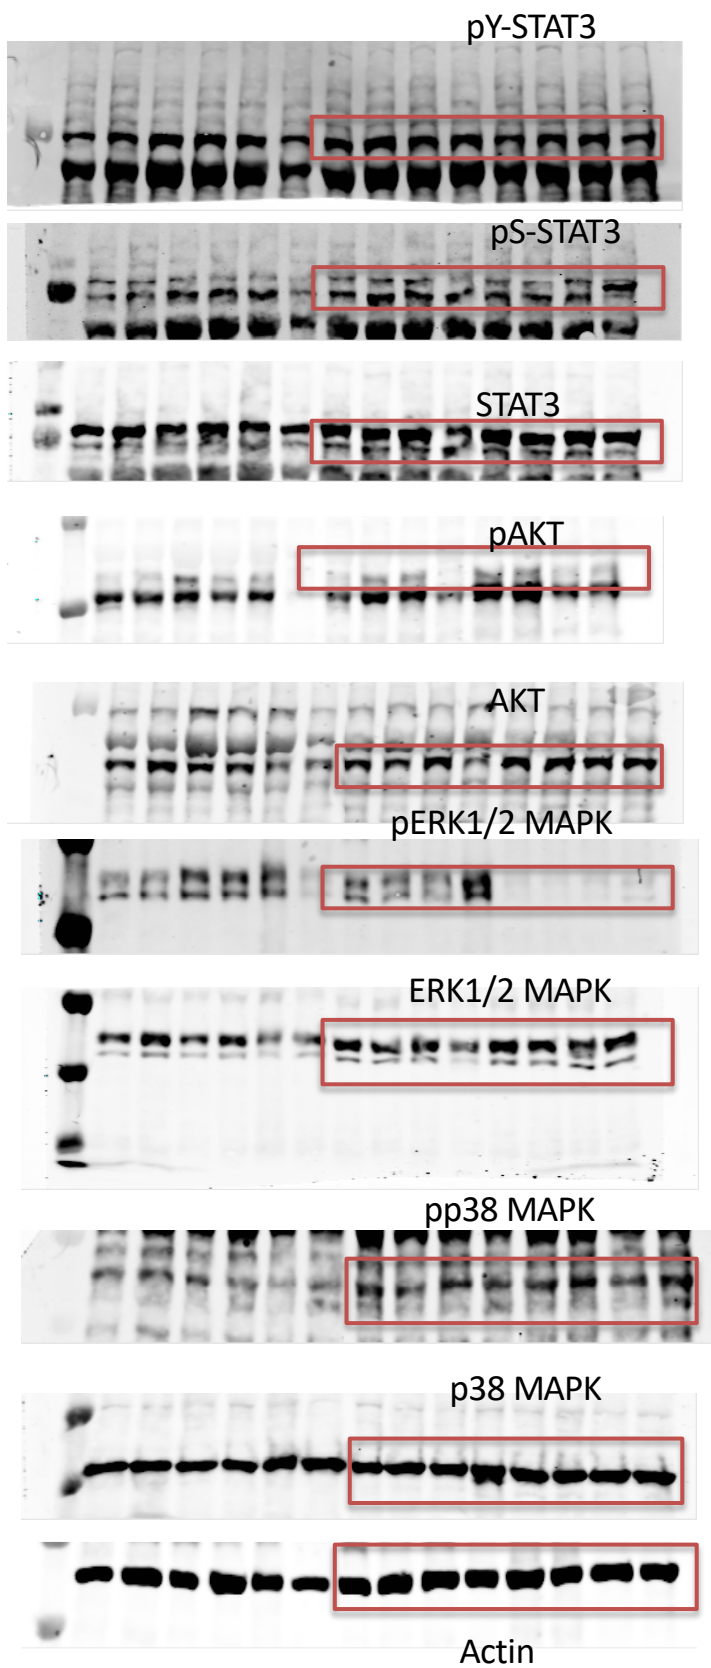

The lanes 4-9 from the left in the actin blot are reproduced and used in Appendix Fig. 2S (B)
