# Supplementary material for: ADAM17 selectively activates the IL‐6 trans‐signaling/ERK MAPK axis in KRAS‐addicted lung cancer
Source: PubMed Central journal article supplement (PMC6460353; doi:10.15252/emmm.201809976), 2019-03-04

Figure 6F

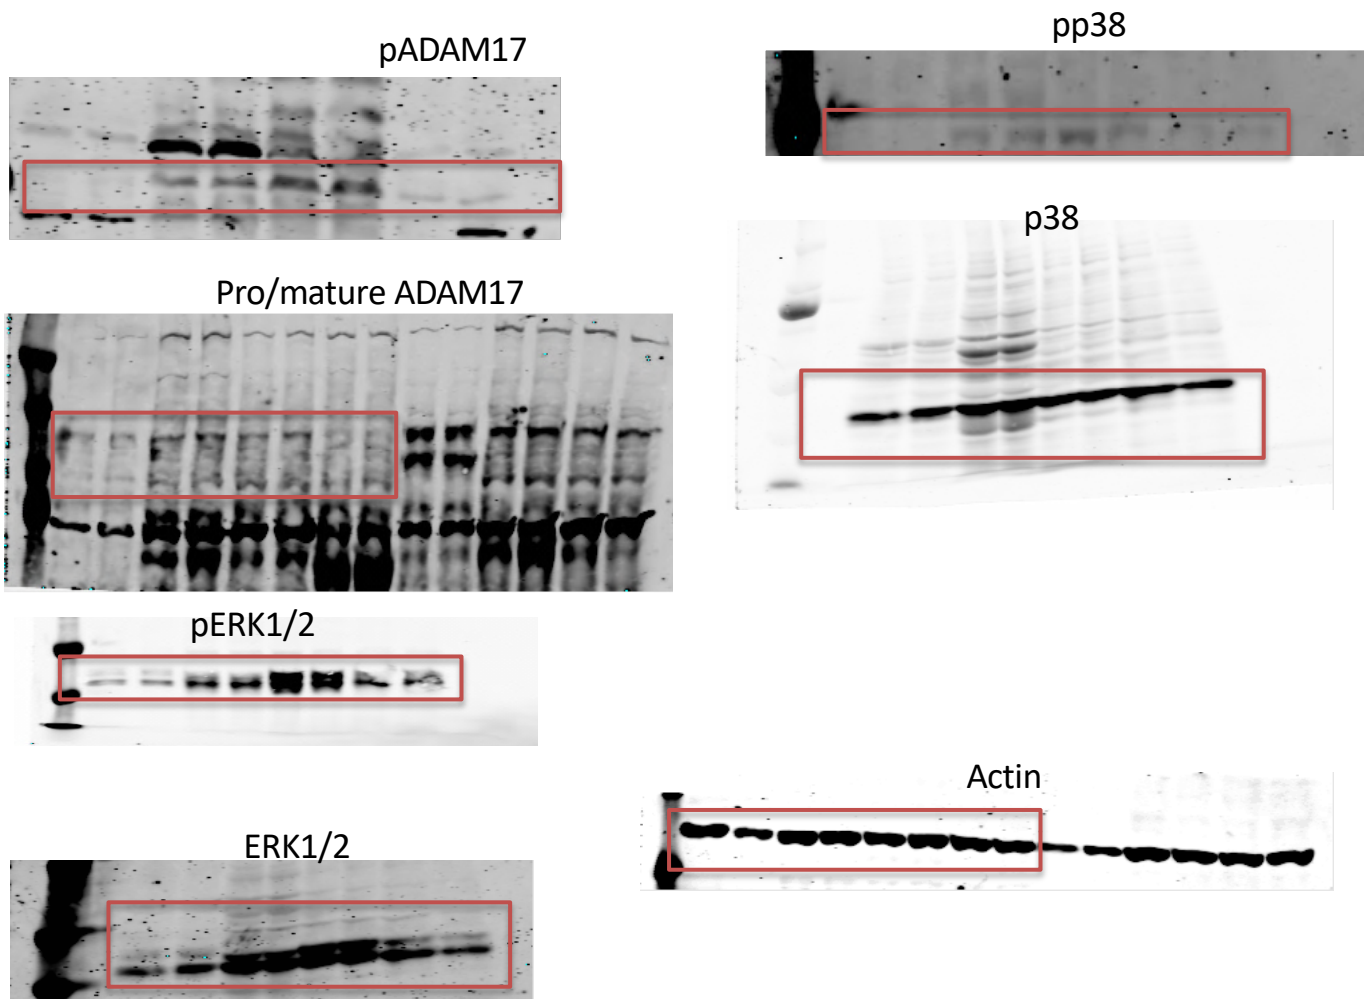

Figure 6Q

Pro/mature NRG1

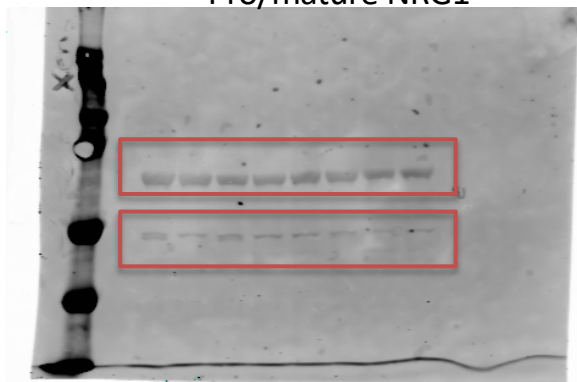

Pro/mature TGF

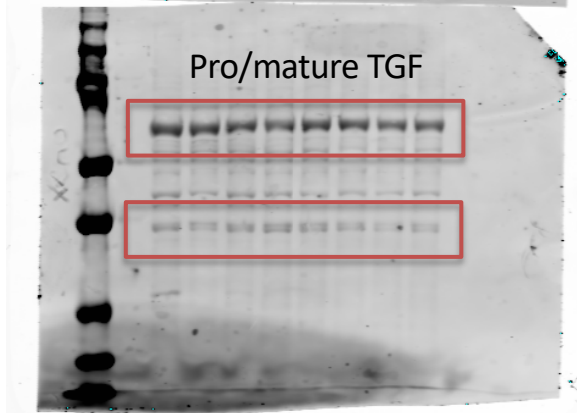

Actin

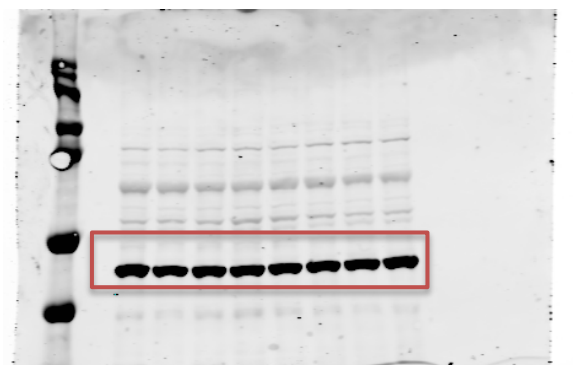

Supplement: EMMM-11-e9976-s006.pdf [file EMMM-11-e9976-s006.pdf]
